# Supplementary material for: An integrative computational approach to effectively guide experimental identification of regulatory elements in promoters
Source: PubMed Central journal article supplement (PMC3465240; doi:10.1186/1471-2105-13-202), 2012-08-16
Supplement: 1471-2105-13-202-S1.pdf [file 1471-2105-13-202-S1.pdf]

# Supplementary material for the article: "An integrative computational approach to effectively guide experimental identification of regulatory elements in promoters"

## 1. The list of programs used for *de novo* motif identification:

All programs were run with default parameters, except number of output modules were set to 10 (when applicable). Programs are taken mainly from review: Sandve, G.K. and Drablos, F. (2006) A survey of motif discovery methods in an integrated framework. *Biol Direct*, 1, 11.

### Programs, that identified specific motifs:

**DME2** - 2 very specific motifs ( $C_{PWM}^+ \geq 0.90$ ;  $C_{PWM}^- \leq 0.15$ ), very convenient output files.

**Meme** - 6 specific motifs, 3 of them are very specific ( $C_{PWM}^+ \geq 0.90$ ;  $C_{PWM}^- \leq 0.15$ )

**CMF** - two motifs out of 12 predicted passed specificity criteria.

**MDScan** - 5 specific motifs, 3 of which are very similar to each other.

### Programs, that identified motifs, but they did not pass specificity criteria

**LocalMotif**

**Seeder**

**Weeder**

**Scope**

### Programs, that were not considered for other reasons.

**Cbs2**- Found on average ~10.5 motifs per sequence. Most are variations of simple repeats like AAAAAA, GGGGGG and so on.

**FIRE** - identified 2 motifs ACTTT and CCCC GCC, no data is provided to construct PWMs.

**MotifVoter** - this program selects motifs found independently by a collection of other programs. No results with default options. With option "All programs" selected, the method identified 2 motifs of length ~30, both with just a few conserved positions. The majority of motifs locate on sequences 134, 48 and 301, both motifs are rejected due to low coverage of positive dataset.

**AlignACE** - all motifs were very unspecific, on average there were 144 motifs per sequence or 3,74 per bp.

**MotifSampler** - (part of TOUCAN) output are dominated by two similar motifs.

**Programs that are not applicable to our dataset.**

**Improbizer** - fails to run with "number of motifs to find" = 6, program reports "sequence data is too big". With "number of motifs to find" =2 program outputs only one motif, than hangs.

**Ann-spec 1.0** - searches only in human and yeast promoters.

**MotifRegressor** - needs expression values. Can not be run just on a set of sequences.

## 2. The list of programs used for *cis*-regulatory module identification:

All programs were run with default parameters, the list is based on reviews:

1. Klepper K. and Sandve G.K., Abul O., Johansen J. and Drablos F. (2008) Assessment of composite motif discovery methods. *BMC Bioinformatics*, 9, 123.
2. Van Loo P. and Marynen P. "Computational methods for the detection of *cis*-regulatory modules". (2009) *Brief Bioinform.* 10, 509-524.
3. Su J., Teichmann S.A. and Down T.A. (2010) Assessing computational methods of *cis*-regulatory module prediction, *PLoS Comput Biol*, 6, e1001020.

**CisModule:** found modules of 200bp in length, that have from 1 to 14 instances of 3 different single motifs in all combinations. No general rule for module structure can be established.

**ModuleSearcher:** This program is a part of TOUCAN project. Results are dominated by 2 frequent motifs (~10 times more frequent than others). CRMs comprising these frequent motifs show good statistical significance, but present not on all sequences.

**Stubb:** did not identify any hits.

**COMET, Cluster-Buster and Cister:** 3 programs from the same lab that search for dense clusters or sites. All programs treat multiple sequences as one long sequence. Programs found clusters with 6 and more motifs and length > 150bp, most of the clusters overlap adjacent sequences. If sequences are submitted separately, finds no clusters.

### ***Programs not used for other reasons.***

**ModuleFinder:** Only executables are provided. Unclear how use user-defined PWMs.

**MCAST:** MCAST identifies very long modules. For example, a top hit is a module consisted from 28 binding sites and spanning 620bp on a 1150bp sequence of the insert 48. Though very significant E-value and high score, this result seems to have little practical use.

**CMA:** Website is partially down (images are not available). No details provided on model parameters (distance, orientation).

**ModuleScanner:** This program is a part of TOUCAN project. Only scans for CRMs using provided templates.

### ***Not available programs:***

**HexDiff:** Website is not available. No supplementary provided. Google search - No results.

**MSCAN:** Website does not exist. Email to authors: "The recipient's e-mail address was not found in the recipient's e-mail system". Google search - No results.

**CO-Bind:** Executables are reported to be on an ftp site. Ftp errors with "no such directory".

**EMCMODULE:** "Executables upon request", e-mail to authors failed: "user unknown".

**HexDiff:** link to source code provided in the manuscript is invalid. Google search - no results.

**RP** - no web site or standalone executables provided.

Supplementary Figure 1S. **Graphical representation of motifs and other features.**

Each red/green/grey long arrow represents a DNA fragment. Numbers relate to internal numbering. Sub fragments marked by \_1, \_2 and \_3. Red color indicate expression in tumor but not in spleen, green - no expression and grey - unspecific expression (both in tumor and spleen). For description of individual features see legend below. DNA sequence of individual features can be found in Excel file in supplementary. We may recommend to print the image on A3 or A2 format.

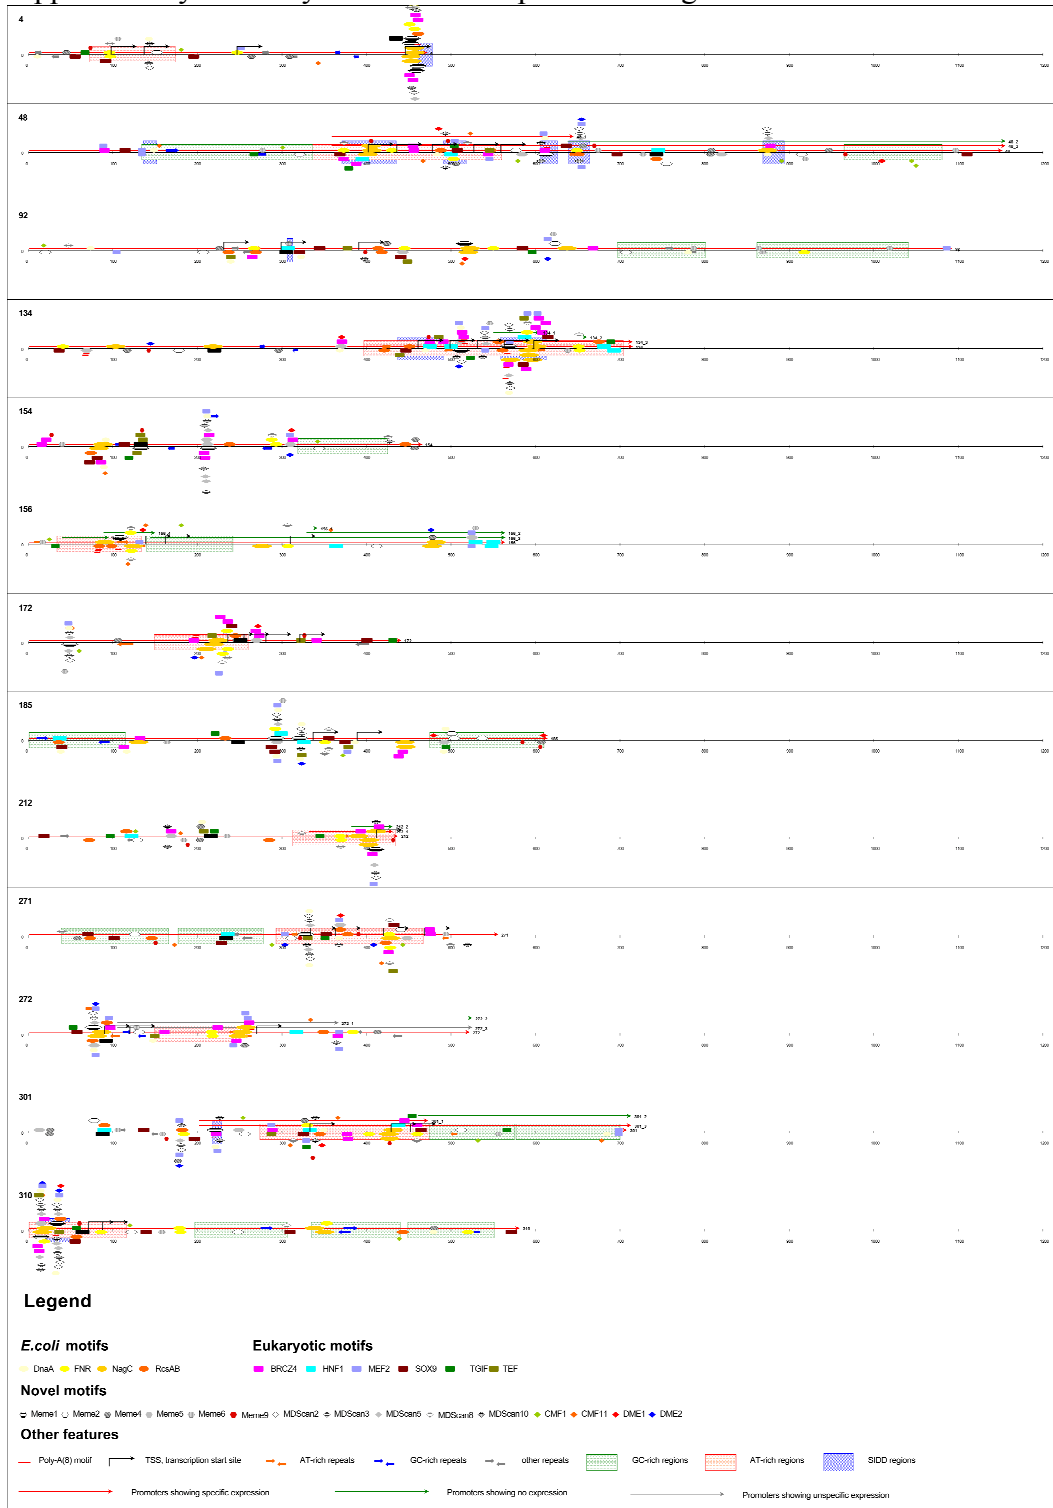

Supplementary Figure 2S. **Graphical representation of promoter modules**

Potential promoter modules responsible for tumor specific transcriptional activation. Similar modules found by genetic algorithm were combined using "OR" logic (modules 3,4,5,9). DNA sequence of individual features can be found in Excel file in supplementary. For description of individual features see legend below.

**Module 1.**

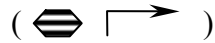

**Module 2.**

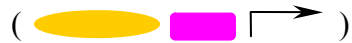

**Module 3.**

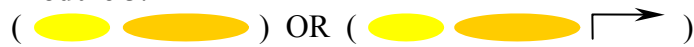

**Module 4.**

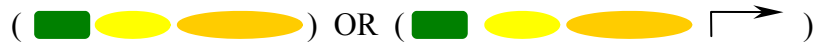

**Module 5.**

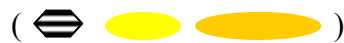

**Module 6.**

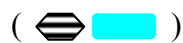

**Module 7.**

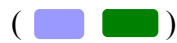

**Module 8.**

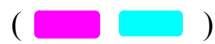

**Module 9.**

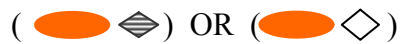

**Module 10.**

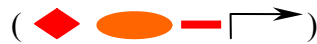

**Module 11.**

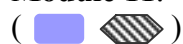

**Legend:**

*E.coli* motifs:

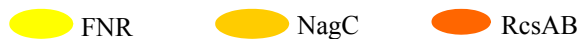

Eukaryotic motifs:

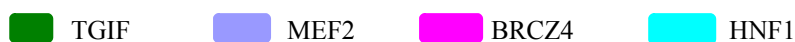

Newly found motifs:

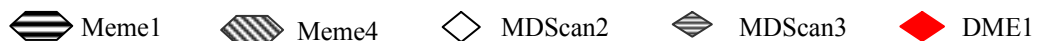

Other features:

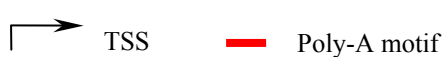

**Fasta formatted sequences of all tumor specific fragments.**

```
>134>Ext_sa_p1_ass.0.358 salm_ass.0.101
gatccccggcgaagcggccccctcttaaaggccattgctgaacataagtggatgccggag
gcgatTTTTTTgacgcatcaccatcacgaccatgTTggcggagTcaaagagctgTTgcaa
cacttccccgcaaatagacggtttatggaccggcgaaacgcaagacaagggagcaaccat
cttgttggcgatggcgatactattcgcgTTTTtaggcgagaaaTTTactCTTTTTGCCacg
ccgggccacacgTTtaggacacgTctgTTactTTtagccGCCtTacttattctgcggcgac
acgctgTTTTccggcggctgTggtcgactgTTTgaaggcaccatcacagatgtatcag
tcacttatgaaaattaactctctgcctgacgacacgctcatttgctgcgctcacgaatac
actttagctaacaattaagtTcgattgagcatacttccgcacgattcgTtcataaatgaa
tattatcgtaaagttaaagagttacgtgtaaaaaaaacaaatgacattaccgTtattctt
aaaaatgagcgtaaagattaatCTTTTTtaagaactgaagatattgatttaattaacgaa
ataaacaaagaaacaatattgcaacaaccagaagcgcgTTTTgcatggTTaaaggTcaaag
aaagacacgTtctgataattctTactTgtcattcgctaacttCGccgTtatgatcggtcg
tTTTTaagcaactattgacacacac
>310>sa_p3_ass.0.258 salm_ass.0.288
gatcgTatCTTTTTataaacacaaccattTTTTataaacatcctgattgaaattgtcat
aaactattaccCGgagTTTTggagTccagcaaccAAaggagacggaatgcatcacgctac
cccgttatcaccaccattgTcgggcgcctTgtgctcgctTTtattctCGgcatgattgc
caacaaattgCGTatttctccactggTgggataTctgTtagcggcgTtctggcgggacc
TTTTaccCGggtTTTgTtgcggataccAAactggcgcggagctggcggagctcggcgt
gattctattgatgTtcggcgtcgggctgcattTTTTcgctgaaggatttgatggcggTaaa
gtctatcgccattcccggcgtgTcgctcagatagcggTggcgacgctgctgggTatggc
gTttccgcgctgTgggagTggtcattaatgaccggcatcgTTTTgggctctgTctgTc
tacagccagtaccgctcgtcctgctgcgcgcgcttgaggagcgacaactccttgatagcca
gcgcgggcaaatcgccatcggtcggctgattgtcgaagatc
>212>sa_p1_ass.0.155 salm_ass.0.63
gatcggTtCGctacaggcaatggaggccattaagctactggcgcattacggTcagcctgc
cagcggaaaaatcgtcatgtacgatgacctgtcagTtccgcgaaatgaagTtaat
gCGcaaccCGgctgTgaggtctgcggcagtagccactTTacggataaaacataccaaag
cacggtttatggccgTgctgtatcaacagataattactgtcatcagacgcaaagccagct
taccCaagctccgactgacgatcggtcaagcagcgcggcatcatcttaaaccgcatacc
acaacctcaaacCGtgatgTtTgacctcatttaacgcctctTtTgTcagaacctctccatt
cgTtgacgcacatcaagatagctttcattcgaagaatTtaattctttatatgaaataag
agaggcCGTttatgatc
>4>first_ass.0.13 salm_ass.0.8
gatctTtgatgaacagggacgTctgtgctgTtcttcgcgTctTactacagcGattgtgtg
acgtTgtcaccataaaagtgtgatgcatattgctTTTTgTcaaaatgtgcgcagaaaaag
gtgatatactgtgcacgTttacacataagcGaggatgatatgtctactgattTggacca
acccaactggcgattgaTTTTtacgCCgtgataaaaccgaactTTtctccCGcagTat
tTgaagcgtTtaaaacagctggagTtagagTttgCCgatctcctcaccctctcagcaacc
gaactgaaagaagagatctatttCGcctggcggTtggcgTgcattaataaaagtctgTgt
aggcgggataaaggcgttagccgcatccggctatgtTaccaggcaatctcaccagacctt
gtccccaggTaatagataaacccccTtgattTgtTtaaaaaaaatacagatc
>48>sa_p2_ass.0.17 salm_ass.0.120
gatcgatggcttCagcGccaatgcctgccgcttcacaggcgcgaataaaggTggcctgaa
acgcaagatcatcttccggcaacgtaataaacagaccatccgTcggttcgacgcaatggc
ggcgatccgTTTTaaaatctggTTTTcactaatgcactcgcgcgcgattcccgctcgg
taaccgataacgagcgcgctgtgcagcagccgTggttacgcccggTcgcgccggtcG
ctatatcatgCCgctccaccagaatgacacgTaaaccgCgacgCgCagTcgcgggcga
tccttgcgcctgTtGctccaccgccaatgataatcacgTcactTgTtTgCgagTcGcgag
TTTTcattgTTTTtccacagTtCGTTTTtatcatttagccatacaaTcatatgTaa
tgTTTTgatttCGgcataatcgctcactattcGaaaatgaaacgTgatttCGTgcgcctt
tctgaacattagTcataaatctgTaaacaatatgtgctgTaatTcacattaacgTgacgT
tctTactTaaatcGcgGCCacactgggagcagcgggTtGTTTgaacgaaactgCGgTg
TTTaccTctaaataaaatagggccacggaggtacaatatgtTgagTatTTTTaaacca
gcgcgcataaaagcgcgctTgCCagcggcggagattgatccgacctatCGccgattacgc
TggcagatTTTTcctggggatattctTggctatgCCgcgTattatctggTgcgcaagaac
```

tttgcocctcgcgatgccctacctggtagaacagggtttttcacgcggcgatctgggcttt  
gcgctgtccgggatttccatcgcttatgggtttttcgaatttataatgggttcgggtgcc  
gatcgctcgaatccgcgcggtttttctgccggcagggttgattctggccgcagcagtcag  
ttgtttatgggctttgtgcccgtgggacatccagcatcgccgtgatgtttgtactgttg  
ttcctttgcggctgggtccaggggatgggggtggccgccgtgcggtcgtacgatggttac  
tggtggctgcagaaagagcgcggcgccattgtgtcggctcggaaacggcgcgataacgtc  
ggcggcgggatc

>301>sa\_p3\_ass.0.148 salm\_ass.0.266  
gatcgccgctgaaaaaccctgttctaccaggtaggggcatcgcgagggcaaagtcttgc  
gcaccagataatacgcggcatagccaaagaatatccccaggaaaatctgccagcgtaatc  
ggcagatagtcggatcaatctccgcccgtggcaagcgcgctttatgcccgcgctggttaa  
aaataactcaacatattgtagcctccgtggcccatattttattagaggtaaacaccgcag  
ttcgttcaacaaccccgcctgccagtggtggccgcgatgttaagtaagatacgtcac  
gttaatgtgaattacagcacatattgttacagatttatgactaatgttcagaaaggcga  
cgaaatcacgtttcattttcgaatagtgcgattatgcgcgaaatcaaaccattacatat  
gatttgtatggctaaatgataaaaaacgaactgtgaggaaaaacaatgaaaactcgcgac  
tcgcaacaagtgcggtgattatcattggcgggtggagcaacaggcgcagggatcgcccgc  
gactgcgcgctgcgcggtttacgtgtcattctggtggagcggcatgatatagcaccggc  
gacaccggggtgtaaccacgggctgctgcacagcggcgtcgttatgcggttaccgacgcg  
gaatccgcgcgcgagtgattagtgaaaaccagattttaaaacggatc

>154>sa\_p2\_ass.0.75 salm\_ass.0.132  
gatccggattacgcaaatataatgcataaaagccaaaattgcgcgactccgcattcttga  
tgagtggaggattgtaatacattgaatttgtgaattaaggctcgcgcggcggagcaatagac  
acttagctaatcatataataaggagtttaggatgaaagtcgcagtcctcggcgcgctgctgg  
tggatcggtcaggcgcgctggcattacttttaaaaaaccaactgccttcaggttcagaact  
ctccctgtacgacatcgctccagtgactcccgggtgtggccggttgatttgagccacatccc  
caccgctgtaaaaaatcaaagggtttctccgggtgaagacgcaaccccggcgcctgaaggcgc  
tgacgtagtactgatttctgcccgtgtggcgcgtaagccgggtatggaccggtccgacct  
gtttaacggttaacgcccggcatcgtgaaaaaccctggtgcagcagatc

>271>sa\_p2\_ass.0.51 salm\_ass.0.128  
gatcgagcaaacgaaagtggcctcgcctaagctgggttaacttcttctgacctgcggca  
ccatcggaaacaatgctgaccttcgctcgtcaccggcccggattgtagcgcacagcggcccac  
aggcggcgttactcaccgcaatggctctgtatgcgggtggcttttgtgatgtgctttgccc  
tcggctttgtatcccgtcatcgtcagcatagcgcgcccggctacgcattgataatccttgc  
cggatggagacatcgccctccggcactctatccccctcctgacggggtaggcctgttgg  
tctaaaaaccctcattttgtatggtatgttgcacaaacctgaaaagcctgacaattccgc  
cacttataaaaaatccagacaaatcagccatataaccattaagagggtatataaagggtgat  
ttgatttacatcaataagcggggtgctgaatcgttaaggtaggcggtaatagaaaagaa  
atcagggcaaaaatgagcaaaagtcagactcgctattatcggtaatggtatggtcggccac  
cgctttattgaggatc

>92>sa\_p3\_ass.0.8 salm\_ass.0.215  
gatcgctttacaggcgaaccccccttctcaatcgctcatcggatgatttacggtagctaac  
ggcggaaactttccacaaccgtacatgcgctggcactgcatacttataccctcaaagagtg  
ggaaggattgcaggatactatcttcgcgctgcctccttctgcgcggcgcgggaagcatcgc  
gtagcaaaacggatgtgcaactacctccgcttttccagtatggtgctacagaattatgtg  
aaaacggcctgcgggcccgttttgttttgcctgaattttgagcgtgtcgtacagattcag  
acaaaaattagccgagaattgtgaaaaccgcccagcagcagcacaatcaccggtctcgcac  
tcacaaaagtgatgcccgtataatgcgcccgtcttatatatgaacgctctcgggatgattc  
tgacgacagggatgtgattgattacgagaacatcccgggtccgcgaagcaaatagcagc  
tgcttgcggagtagagttgaccgagcactgtgattttttgaggtaacaagatgcaagttt  
cagttgaaaccactcagggccttggccgcccgtgtaacgattacaatcgctgctgacagc  
atcagagaccgctgtaaaaagcagagctggcacaagtagcgaaaaaagtagctattgacggc  
ttccgtaaaaggcaagtagcagatgaatatcgtcgcctcagcgttatggcgttctgttccg  
caggacgtgctgggcgatcattccctggaacgcccgcctttcacgctgcctgacgcttat  
tgaaagcgtgcaggggagcaggttcagccgttacgtaccggaagacatcaccacgctact  
gtcagtagcgcagccgttgaaactgcgcgggtttcagccgtgggataccttctgcgatgc  
catccatacagatgatgagcaaacacctgctccccgcccagcgggaaaggcgttctggtcgc  
gctgcgcccgggtgccgggcatcggggtgagcagggcgttaacattatgtcggcacaacag  
ggcggcgatattatgaccatcggcggcaaccgtctggaagggtggttatcattctgccc  
gggtctaacgatc

>185>sa\_p4\_ass.0.245 salm\_ass.0.365



gatcgcgcgctgcccgatgcggaacgcacaggaattattgatatcgtgacgtcatggccg  
ggagtcagcggcgccacgatctccgcacgcggcagtcagggccgactcgctttattcag  
attcatttggaatggaagataatctgccgctcgttcaggcgcattttgtggctgaccag  
gtagagcaggcgattttacagcgttttccgggttcagatgtcattattcatcaggatccc  
tgttcagtcggtcccaggggaaggcaggaagttcgagcttgtataattgattgttaaaaag  
tgagccaggccagcattttgtgtataaattaccgccatttggcctgacctgaatcaattc  
agcaggaagggattgttatactatctgtatattcgttggatcgtttcgaagtgcgaaatc  
ggcttccggcaatagatttcattttgattccaaagttcagaggtagtcattgattaagaa  
aatcgggtgtgttgacaagcggcggtgatgcgcccggcatgaacgcggcaatccgcgggtgt  
tgtgcgcgcagcgttgacggaagggctggaagtcatgggcatttatgacggctatctggg  
cctgtatgaagatc

>172>sa\_p4\_ass.0.181 salm\_ass.0.349

gatcggcaagaacgcagcggatttccgccataatcgccgcacgttttaataaattgggga  
tggacgcgctcggctgccaggttggcgtttcgctcatgattctttctccagtttaagaca  
aggtcacgaagtctactcgcaacgcgcgggcaaaacaaattttgcgcaggcgtatcgggc  
gccttctggagggtaaaaaaagtgattcagatggtttagtaattaaatcaaaatc  
aatgataattcatccctctgatacgtataaaaaaatcgaacacgtcaaatttccctcacat  
ccctgagactatactgttgtaccataaaggagcagtggaacgcattcatacttcgcag  
aaccagaggctttatctggctgcgcgagggtgaaattacaataatctggaggaatgtcg  
tgcaaacctttcaagccgatc

>156>sa\_p5\_ass.0.121 salm\_ass.0.420

gatcgcgaaggtgaaaatgagcccaaccctggacaggaagcgttgagcttttcgatgtgcg  
ccagttaaaattctggcgttttttctcaccgaattttctcattttttctcaacgtgatt  
ttcatcactataagaaaatcacgtaagtgttgaatagtgccggagagagagggttcga  
accctcggcggagttacccccgcaacggttttcgagaccggtccggttcagccgctccggc  
atctctccgtatattgcaatgatgccaggttaatttggcatttttaacagaccctattcggg  
taattttgttcaagtgcagagtttacgagcaaaacgatgattaagtggccctggaaagca  
caagaataaaccagaacgaagactggccgtgggatgatgcgctggctatacctcttctg  
gtaaacctcaccgcgcaagaacaggtcggcttattgcgctagccgaacgttttttgcag  
cagaaaagactggtagcgtacagggatttgagctcgactcgttaaaaagtgcacgtatt  
gcgttaattttttgcttaccgatc

>272>sa\_p6\_ass.0.89 salm\_ass.0.506

gatcaccaccgataactttgctcgcctgttccatattgacgcgtctcgcctgtcatcaat  
ccgttaaaccgagtttttttaagctcgttaattaataaaacaaaacgcgtaaaagttcaccgc  
cacaaaagggcggtgagcgcgcttatggaaacattcggaaactcattttggcagaatgt  
gatacttttttaggctatctggcgtgaaacgtgatagccgtcaaaacaaatcagacgtat  
ttattttactctgtgtaataaataaaagggcacttagatgtcctgtccacggcgggggtc  
tccccctcgcgaatgcgctgagaacgtagaaaagcacaataactcaggagcactctcaat  
tatgtttaagaatgcatttgctaacctgcaaaaggtcggtaaatcgctgatgctgcccgt  
atccgtactccctatcgcaggtatcctgctgggtgtcggttccgctaacttcagctggct  
gccagccggttgtatcgcacgttatggcagaagcgggcccgatc
